# Supplementary material
Source: PubMed Central journal article supplement (PMC6240129)
Supplement: BPH-175-4338-s001.pdf [file BPH-175-4338-s001.pdf]

## 1 **Supplementary Figure Legends**

### 2 **Supplementary Figure 1**

3 ZFP91 up-regulates the production and activation of pro-IL-1 $\beta$  in THP-1 cells. (A)  
4 PMA-differentiated THP-1 cells were transduced with lentiviruses containing ZFP91  
5 gene using multiplicities of infection (MOI) of 10, 50, and 100 for 24 h and then  
6 stimulated with 1  $\mu$ g/ml LPS for 6 h. The protein levels of IL-1 $\beta$  were measured by  
7 western blot analysis. (B) PMA-differentiated THP-1 cells were transduced with  
8 lentiviruses containing ZFP91 gene for 24 h and then un-stimulated or stimulated with  
9 1  $\mu$ g/ml LPS for 6 h. The protein levels of IL-1 $\beta$  and pro-IL-1 $\beta$  were measured by  
10 western blot analysis.

11

### 12 **Supplementary Figure 2**

13 ZFP91 enhances the expression of non-canonical caspase-8 inflammasome  
14 components in THP-1 cells. (A) PMA-differentiated THP-1 cells were transduced  
15 with lentiviruses containing ZFP91 gene using MOI of 10, 50, and 100 for 24 h and  
16 then stimulated with 1  $\mu$ g/ml LPS for 6 h. The protein levels of caspase-8 and cleaved  
17 caspase-8 were measured by western blot analysis. (B) PMA-differentiated THP-1  
18 cells were transduced with lentiviruses containing ZFP91 gene (MOI = 100) for 24 h  
19 and then un-stimulated or stimulated with 1  $\mu$ g/ml LPS for 6 h. The protein levels of  
20 NLRP3, ASC, and cleaved caspase-8 were measured by western blot analysis.

21

### 22 **Supplementary Figure 3**

23 Silencing of NLRP3, ASC or caspase-8 reduced the production of IL-1 $\beta$  in  
24 LPS-stimulated THP-1 cells. PMA-differentiated THP-1 cells were transduced with  
25 lentiviruses carrying NLRP3, ASC or caspase-8 siRNA (MOI = 100) for 24 h and then

1 stimulated with 1  $\mu\text{g/ml}$  LPS for 6 h. IL-1 $\beta$  was detected by ELISA. Data are the  
2 mean  $\pm$  SD of five independent experiments. <sup>###</sup> $P < 0.001$  vs. control group (cultured  
3 in medium alone); \* $P < 0.05$  vs. LPS-induced group. The protein levels of pro-IL-1 $\beta$ ,  
4 NLRP3, ASC and cleaved caspase-8 were measured by western blot analysis.

5

#### 6 **Supplementary Figure 4**

7 ZFP91 enhances the activation of MAPKs in THP-1 cells. (A) PMA-differentiated  
8 THP-1 cells were transduced with lentiviruses containing ZFP91 gene (MOI = 100)  
9 for 24 h and then un-stimulated or stimulated with 1  $\mu\text{g/ml}$  LPS for 6 h. The protein  
10 levels of p-ERK, p-p38, p-JNK, ERK, p38 and JNK were measured by western blot  
11 analysis. (B) PMA-differentiated THP-1 cells were transduced with lentiviruses  
12 containing ZFP91 gene (MOI = 100) for 24 h and then un-stimulated or stimulated  
13 with 1  $\mu\text{g/ml}$  LPS for 6 h. Nuclear extracts were analyzed by western blot using  
14 indicated antibodies for p65 and Topo-I. Cytoplasmic extracts were analyzed by  
15 western blot using indicated antibodies for p65 and tubulin.

16

#### 17 **Supplementary Figure 5**

18 The inhibitor of ERK, p38, or JNK reduced the production of pro-IL-1 $\beta$  in  
19 LPS-stimulated THP-1 cells. PMA-differentiated THP-1 cells were stimulated with 1  
20  $\mu\text{g/ml}$  LPS alone or with ERK inhibitor (50  $\mu\text{M}$ ), p38 inhibitor (25  $\mu\text{M}$ ), JNK  
21 inhibitor (50  $\mu\text{M}$ ) for 6 h. The protein levels of pro-IL-1 $\beta$ , p-ERK, ERK, p-p38, p38,  
22 p-JNK and JNK were measured by western blot analysis.
